# Supplementary material for: Cognitive impairment and clinical characteristics in patients with chronic obstructive pulmonary disease
Source: PubMed Central journal article supplement — Chron Respir Dis. 2017 May 29;15(2):91–102. doi: 10.1177/1479972317709651 (PMC5958463; doi:10.1177/1479972317709651), 2017-05-29
Supplement: Supplementary_Material.pdf [file Supplementary_Material.pdf]

## Supplementary Material

**Table S1. Correlations between domain-specific cognitive functioning, individual cognitive test measures, and FEV<sub>1</sub> in patients with COPD**

| FEV <sub>1</sub>                                | Correlation coefficient | P-value |
|-------------------------------------------------|-------------------------|---------|
| <b>Domain-specific cognition</b>                |                         |         |
| <b>Psychomotor speed (compound z-score)</b>     | -0.136 <sup>a</sup>     | 0.066   |
| SCWT card I                                     | 0.046 <sup>a</sup>      | 0.532   |
| CST-A                                           | 0.034 <sup>a</sup>      | 0.649   |
| LDST 60 sec written                             | -0.053 <sup>b</sup>     | 0.475   |
| LDST 60 sec oral                                | -0.112 <sup>b</sup>     | 0.132   |
| <b>Planning (compound z-score)</b>              | 0.056 <sup>b</sup>      | 0.455   |
| BADS key search                                 | -0.093 <sup>b</sup>     | 0.210   |
| BADS zoo map                                    | 0.022 <sup>a</sup>      | 0.766   |
| <b>Working memory (compound z-score)</b>        | -0.111 <sup>b</sup>     | 0.136   |
| VVLT trial 1                                    | -0.002 <sup>b</sup>     | 0.982   |
| DS backward                                     | -0.176 <sup>b</sup>     | 0.017   |
| <b>Verbal memory (compound z-score)</b>         | -0.032 <sup>b</sup>     | 0.663   |
| VVLT total recall 1–5                           | -0.003 <sup>b</sup>     | 0.663   |
| VVLT delayed recall                             | -0.054 <sup>b</sup>     | 0.469   |
| VVLT retention max                              | -0.053 <sup>a</sup>     | 0.475   |
| <b>Cognitive flexibility (compound z-score)</b> | -0.170 <sup>b</sup>     | 0.021   |
| SCWT card III                                   | 0.059 <sup>a</sup>      | 0.430   |
| CST-C                                           | 0.101 <sup>a</sup>      | 0.175   |

Abbreviations: BADS, Behavioural Assessment of the Dysexecutive Syndrome; CST, Concept Shifting Test; DS, Digit Span; LDST, Letter Digit Substitution Test; SCWT, Stroop Color-Word Test; SD, standard deviation; VVLT, Visual Verbal Learning Test. <sup>a</sup>, Spearman's rank correlation coefficient; <sup>b</sup>, Pearson's correlation coefficient

**Table S2. Clinical characteristics in COPD patients with and without impairments in psychomotor speed**

|                                         | <b>Patients with impairments in psychomotor speed (n=18)</b> | <b>Patients without impairments in psychomotor speed (n=165)</b> | <b>P-value</b> |
|-----------------------------------------|--------------------------------------------------------------|------------------------------------------------------------------|----------------|
| <b>FUNCTIONAL STATUS</b>                |                                                              |                                                                  |                |
| <b>Functional exercise capacity</b>     |                                                              |                                                                  |                |
| 6MWT (meters)                           | 440.0 (122.1)                                                | 431.1 (111.0)                                                    | 0.750          |
| 6MWT (% predicted)                      | 66.7 (16.6)                                                  | 68.4 (16.6)                                                      | 0.668          |
| <b>Daily activities</b>                 |                                                              |                                                                  |                |
| COPM mobility domain, n (%)             | 0.9 (0.3)                                                    | 0.8 (0.4)                                                        | 0.339          |
| Performance score (points)              | 3.8 (1.9)                                                    | 3.8 (1.5)                                                        | 0.921          |
| Satisfaction score (points)             | 3.3 (2.0)                                                    | 2.8 (1.7)                                                        | 0.347          |
| COPM productivity domain, n (%)         | 0.8 (0.4)                                                    | 0.6 (0.5)                                                        | 0.200          |
| Performance score (points)              | 4.2 (1.5)                                                    | 3.8 (1.5)                                                        | 0.393          |
| Satisfaction score (points)             | 4.2 (1.8)                                                    | 3.1 (1.8)                                                        | 0.050          |
| COPM leisure domain, n (%)              | 0.4 (0.5)                                                    | 0.5 (0.5)                                                        | 0.539          |
| Performance score (points)              | 3.1 (1.7)                                                    | 3.5 (1.6)                                                        | 0.572          |
| Satisfaction score (points)             | 1.8 (1.0)                                                    | 2.9 (1.6)                                                        | 0.126          |
| COPM self-care domain, n (%)            | 0.4 (0.5)                                                    | 0.5 (0.5)                                                        | 0.442          |
| Performance score (points)              | 4.7 (1.4)                                                    | 4.1 (1.6)                                                        | 0.421          |
| Satisfaction score (points)             | 3.6 (1.1)                                                    | 3.1 (1.9)                                                        | 0.563          |
| <b>DISEASE-SPECIFIC HEALTH STATUS</b>   |                                                              |                                                                  |                |
| CAT score (points)                      | 22.5 (5.8)                                                   | 22.0 (6.6)                                                       | 0.739          |
| SGRQ-C symptom score (points)           | 59.3 (16.2)                                                  | 61.7 (20.0)                                                      | 0.632          |
| SGRQ-C activity score (points)          | 75.7 (13.8)                                                  | 77.2 (14.2)                                                      | 0.677          |
| SGRQ-C impact score (points)            | 50.6 (12.6)                                                  | 45.8 (17.1)                                                      | 0.258          |
| SGRQ-C total score (points)             | 59.9 (10.9)                                                  | 58.2 (14.2)                                                      | 0.635          |
| <b>PSYCHOLOGICAL WELLBEING</b>          |                                                              |                                                                  |                |
| HADS Depression score (points)          | 8.6 (3.4)                                                    | 7.2 (4.0)                                                        | 0.180          |
| HADS Anxiety score (points)             | 9.6 (4.9)                                                    | 7.8 (4.4)                                                        | 0.117          |
| BDI score score (points)                | 17.7 (5.6)                                                   | 16.0 (6.3)                                                       | 0.272          |
| SCL-90 Anxiety score (points)           | 11.6 (4.5)                                                   | 9.9 (4.2)                                                        | 0.102          |
| SCL-90 Agoraphobia score (points)       | 30.8 (9.2)                                                   | 27.6 (10.8)                                                      | 0.229          |
| SCL-90 Depression score (points)        | 26.4 (10.6)                                                  | 23.1 (7.1)                                                       | 0.078          |
| SCL-90 Somatization score (points)      | 22.0 (7.0)                                                   | 17.5 (5.6)                                                       | 0.002          |
| SCL-90 Insufficiency score (points)     | 27.6 (8.0)                                                   | 26.0 (8.3)                                                       | 0.456          |
| SCL-90 Sensitivity score (points)       | 8.1 (1.7)                                                    | 7.7 (2.3)                                                        | 0.432          |
| SCL-90 Hostility score (points)         | 6.9 (2.3)                                                    | 6.5 (3.0)                                                        | 0.621          |
| SCL-90 Insomnia score (points)          | 14.2 (5.0)                                                   | 12.4 (4.1)                                                       | 0.082          |
| SCL-90 Psychoneuroticism score (points) | 165.3 (34.0)                                                 | 146.8 (42.8)                                                     | 0.077          |

Data shown as mean (SD) or as n (%). Abbreviations: 6MWT. 6-min walk distance; BDI Beck Depression Inventory; COPM. Canadian Occupational Performance Measure; HADS. Hospital Anxiety and Depression Scale; SCL-90 Symptom Checklist 90; SGRQ-C. COPD-specific version of the St. George respiratory questionnaire.

**Table S3. Clinical characteristics in COPD patients with and without impairments in planning**

|                                         | <b>Patients with impairments in planning (n=20)</b> | <b>Patients without impairments in planning (n=163)</b> | <b>P-value</b> |
|-----------------------------------------|-----------------------------------------------------|---------------------------------------------------------|----------------|
| <b>FUNCTIONAL STATUS</b>                |                                                     |                                                         |                |
| <b>Functional exercise capacity</b>     |                                                     |                                                         |                |
| 6MWT (meters)                           | 392.3 (93.2)                                        | 436.9 (113.2)                                           | 0.092          |
| 6MWT (% predicted)                      | 64.2 (15.1)                                         | 68.8 (16.7)                                             | 0.241          |
| <b>Daily activities</b>                 |                                                     |                                                         |                |
| COPM mobility domain, n (%)             | 0.8 (0.4)                                           | 0.8 (0.4)                                               | 0.969          |
| Performance score (points)              | 3.9 (1.6)                                           | 3.7 (1.6)                                               | 0.678          |
| Satisfaction score (points)             | 3.3 (1.9)                                           | 2.8 (1.7)                                               | 0.253          |
| COPM productivity domain, n (%)         | 0.8 (0.4)                                           | 0.6 (0.5)                                               | 0.277          |
| Performance score (points)              | 4.5 (1.2)                                           | 3.8 (1.6)                                               | 0.101          |
| Satisfaction score (points)             | 4.0 (1.8)                                           | 3.1 (1.8)                                               | 0.088          |
| COPM leisure domain, n (%)              | 0.5 (0.5)                                           | 0.5 (0.5)                                               | 0.898          |
| Performance score (points)              | 3.4 (1.6)                                           | 3.4 (1.6)                                               | 0.902          |
| Satisfaction score (points)             | 3.7 (1.6)                                           | 2.7 (1.6)                                               | 0.111          |
| COPM self-care domain, n (%)            | 0.5 (0.5)                                           | 0.5 (0.5)                                               | 0.817          |
| Performance score (points)              | 4.4 (1.8)                                           | 4.1 (1.6)                                               | 0.693          |
| Satisfaction score (points)             | 4.4 (0.6)                                           | 3.0 (1.8)                                               | 0.045          |
| <b>DISEASE-SPECIFIC HEALTH STATUS</b>   |                                                     |                                                         |                |
| CAT score (points)                      | 21.8 (6.6)                                          | 22.1 (6.5)                                              | 0.867          |
| SGRQ-C symptom score (points)           | 57.0 (18.7)                                         | 62.0 (19.8)                                             | 0.293          |
| SGRQ-C activity score (points)          | 81.6 (14.3)                                         | 76.5 (14.0)                                             | 0.137          |
| SGRQ-C impact score (points)            | 52.5 (14.8)                                         | 45.5 (16.9)                                             | 0.088          |
| SGRQ-C total score (points)             | 62.4 (11.9)                                         | 57.9 (14.1)                                             | 0.185          |
| <b>PSYCHOLOGICAL WELLBEING</b>          |                                                     |                                                         |                |
| HADS Depression score (points)          | 9.1 (3.3)                                           | 7.2 (4.0)                                               | 0.049          |
| HADS Anxiety score (points)             | 8.1 (3.7)                                           | 8.0 (4.6)                                               | 0.926          |
| BDI score score (points)                | 16.5 (5.6)                                          | 16.2 (6.3)                                              | 0.844          |
| SCL-90 Anxiety score (points)           | 10.1 (3.5)                                          | 10.0 (4.3)                                              | 0.960          |
| SCL-90 Agoraphobia score (points)       | 29.1 (11.7)                                         | 27.8 (10.6)                                             | 0.613          |
| SCL-90 Depression score (points)        | 23.9 (8.4)                                          | 23.3 (7.5)                                              | 0.781          |
| SCL-90 Somatization score (points)      | 20.7 (8.0)                                          | 17.6 (5.5)                                              | 0.025          |
| SCL-90 Insufficiency score (points)     | 8.0 (2.8)                                           | 26.0 (8.0)                                              | 0.367          |
| SCL-90 Sensitivity score (points)       | 7.0 (3.1)                                           | 7.7 (2.2)                                               | 0.547          |
| SCL-90 Hostility score (points)         | 8.0 (2.8)                                           | 6.5 (2.9)                                               | 0.482          |
| SCL-90 Insomnia score (points)          | 12.7 (3.8)                                          | 12.6 (4.3)                                              | 0.897          |
| SCL-90 Psychoneuroticism score (points) | 155.7 (45.2)                                        | 147.7 (42.0)                                            | 0.430          |

Data shown as mean (SD) or as n (%). Abbreviations: 6MWT. 6-min walk distance; BDI Beck Depression Inventory; COPM. Canadian Occupational Performance Measure; HADS. Hospital Anxiety and Depression Scale; SCL-90 Symptom Checklist 90; SGRQ-C. COPD-specific version of the St. George respiratory questionnaire.

**Table S4. Clinical characteristics in COPD patients with and without impairments in working memory**

|                                         | Patients with impairments in working memory (n=47) | Patients without impairments in working memory (n=136) | P-value |
|-----------------------------------------|----------------------------------------------------|--------------------------------------------------------|---------|
| <b>FUNCTIONAL STATUS</b>                |                                                    |                                                        |         |
| <b>Functional exercise capacity</b>     |                                                    |                                                        |         |
| 6MWT (meters)                           | 426.3 (426.3)                                      | 434.0 (109.0)                                          | 0.686   |
| 6MWT (% predicted)                      | 67.6 (17.0)                                        | 68.5 (16.5)                                            | 0.741   |
| <b>Daily activities</b>                 |                                                    |                                                        |         |
| COPM mobility domain, n (%)             | 0.8 (0.4)                                          | 0.8 (1.6)                                              | 0.750   |
| Performance score (points)              | 3.6 (1.5)                                          | 3.8 (1.6)                                              | 0.575   |
| Satisfaction score (points)             | 2.6 (1.7)                                          | 2.9 (1.8)                                              | 0.368   |
| COPM productivity domain, n (%)         | 0.7 (0.5)                                          | 0.6 (0.5)                                              | 0.301   |
| Performance score (points)              | 4.0 (1.5)                                          | 3.8 (1.6)                                              | 0.510   |
| Satisfaction score (points)             | 3.4 (1.7)                                          | 3.2 (1.9)                                              | 0.696   |
| COPM leisure domain, n (%)              | 0.5 (0.5)                                          | 0.5 (0.5)                                              | 0.701   |
| Performance score (points)              | 3.1 (1.4)                                          | 3.6 (1.6)                                              | 0.208   |
| Satisfaction score (points)             | 2.8 (1.4)                                          | 2.8 (1.7)                                              | 0.991   |
| COPM self-care domain, n (%)            | 0.4 (0.5)                                          | 0.5 (0.5)                                              | 0.430   |
| Performance score (points)              | 4.6 (1.4)                                          | 4.0 (1.6)                                              | 0.152   |
| Satisfaction score (points)             | 3.7 (1.1)                                          | 3.0 (2.0)                                              | 0.168   |
| <b>DISEASE-SPECIFIC HEALTH STATUS</b>   |                                                    |                                                        |         |
| CAT score (points)                      | 22.0 (6.4)                                         | 22.0 (6.6)                                             | 0.984   |
| SGRQ-C symptom score (points)           | 60.8 (21.1)                                        | 61.7 (19.2)                                            | 0.803   |
| SGRQ-C activity score (points)          | 78.0 (14.9)                                        | 76.7 (13.9)                                            | 0.608   |
| SGRQ-C impact score (points)            | 48.5 (1.9)                                         | 45.6 (16.0)                                            | 0.316   |
| SGRQ-C total score (points)             | 59.7 (15.2)                                        | 57.9 (13.4)                                            | 0.455   |
| <b>PSYCHOLOGICAL WELLBEING</b>          |                                                    |                                                        |         |
| HADS Depression score (points)          | 7.8 (4.0)                                          | 7.2 (4.0)                                              | 0.387   |
| HADS Anxiety score (points)             | 8.9 (4.5)                                          | 7.7 (4.4)                                              | 0.110   |
| BDI score score (points)                | 16.8 (5.7)                                         | 16.0 (6.4)                                             | 0.447   |
| SCL-90 Anxiety score (points)           | 11.1 (4.4)                                         | 9.7 (4.1)                                              | 0.053   |
| SCL-90 Agoraphobia score (points)       | 29.9 (10.5)                                        | 27.3 (10.7)                                            | 0.158   |
| SCL-90 Depression score (points)        | 23.9 (7.7)                                         | 23.2 (7.5)                                             | 0.593   |
| SCL-90 Somatization score (points)      | 19.5 (6.6)                                         | 17.4 (5.5)                                             | 0.038   |
| SCL-90 Insufficiency score (points)     | 28.4 (9.3)                                         | 25.4 (7.7)                                             | 0.034   |
| SCL-90 Sensitivity score (points)       | 7.9 (2.3)                                          | 7.6 (2.3)                                              | 0.475   |
| SCL-90 Hostility score (points)         | 7.2 (3.4)                                          | 6.3 (2.8)                                              | 0.079   |
| SCL-90 Insomnia score (points)          | 13.1 (4.4)                                         | 12.4 (4.1)                                             | 0.345   |
| SCL-90 Psychoneuroticism score (points) | 157.7 (42.7)                                       | 145.4 (41.9)                                           | 0.087   |

Data shown as mean (SD) or as n (%). Abbreviations: 6MWT. 6-min walk distance; BDI Beck Depression Inventory; COPM. Canadian Occupational Performance Measure; HADS. Hospital Anxiety and Depression Scale; SCL-90 Symptom Checklist 90; SGRQ-C. COPD-specific version of the St. George respiratory questionnaire.

**Table S5. Clinical characteristics in COPD patients with and without impairments in verbal memory**

|                                         | Patients with impairments in verbal memory (n=50) | Patients without impairments in verbal memory (n=133) | P-value |
|-----------------------------------------|---------------------------------------------------|-------------------------------------------------------|---------|
| <b>FUNCTIONAL STATUS</b>                |                                                   |                                                       |         |
| <b>Functional exercise capacity</b>     |                                                   |                                                       |         |
| 6MWT (meters)                           | 400.2 (111.1)                                     | 443.9 (110.1)                                         | 0.018   |
| 6MWT (% predicted)                      | 64.1 (17.1)                                       | 69.8 (16.2)                                           | 0.035   |
| <b>Daily activities</b>                 |                                                   |                                                       | 0.629   |
| COPM mobility domain, n (%)             | 0.8 (0.4)                                         | 0.8 (0.4)                                             |         |
| Performance score (points)              | 3.8 (1.7)                                         | 3.8 (1.5)                                             | 0.850   |
| Satisfaction score (points)             | 2.8 (1.9)                                         | 2.8 (1.7)                                             | 0.998   |
| COPM productivity domain, n (%)         | 0.6 (0.5)                                         | 0.6 (0.5)                                             | 0.740   |
| Performance score (points)              | 3.9 (1.5)                                         | 3.9 (1.6)                                             | 0.926   |
| Satisfaction score (points)             | 3.5 (1.9)                                         | 3.2 (1.8)                                             | 0.453   |
| COPM leisure domain, n (%)              | 0.5 (0.5)                                         | 0.5 (0.5)                                             | 0.579   |
| Performance score (points)              | 3.5 (1.5)                                         | 3.4 (1.7)                                             | 0.841   |
| Satisfaction score (points)             | 2.9 (1.6)                                         | 2.8 (1.6)                                             | 0.775   |
| COPM self-care domain, n (%)            | 0.5 (0.5)                                         | 0.5 (0.5)                                             | 0.799   |
| Performance score (points)              | 4.2 (1.8)                                         | 4.2 (1.5)                                             | 0.991   |
| Satisfaction score (points)             | 3.4 (2.2)                                         | 3.1 (1.6)                                             | 0.444   |
| <b>DISEASE-SPECIFIC HEALTH STATUS</b>   |                                                   |                                                       | 0.322   |
| CAT score (points)                      | 21.2 (6.9)                                        | 22.3 (6.4)                                            |         |
| SGRQ-C symptom score (points)           | 59.0 (22.3)                                       | 62.3 (18.7)                                           | 0.320   |
| SGRQ-C activity score (points)          | 79.4 (13.0)                                       | 76.2 (14.4)                                           | 0.193   |
| SGRQ-C impact score (points)            | 48.4 (18.2)                                       | 45.5 (16.2)                                           | 0.310   |
| SGRQ-C total score (points)             | 59.8 (15.1)                                       | 57.8 (13.4)                                           | 0.399   |
| <b>PSYCHOLOGICAL WELLBEING</b>          |                                                   |                                                       | 0.932   |
| HADS Depression score (points)          | 7.4 (3.8)                                         | 7.3 (4.0)                                             |         |
| HADS Anxiety score (points)             | 7.8 (4.8)                                         | 8.0 (4.4)                                             | 0.790   |
| BDI score score (points)                | 15.8 (10.1)                                       | 15.4 (0.5)                                            | 0.139   |
| SCL-90 Anxiety score (points)           | 15.1 (5.2)                                        | 16.6 (6.5)                                            | 0.605   |
| SCL-90 Agoraphobia score (points)       | 10.3 (4.1)                                        | 10.0 (4.3)                                            | 0.404   |
| SCL-90 Depression score (points)        | 26.9 (9.4)                                        | 28.4 (11.1)                                           | 0.008   |
| SCL-90 Somatization score (points)      | 21.0 (6.1)                                        | 24.3 (7.9)                                            | 0.447   |
| SCL-90 Insufficiency score (points)     | 17.4 (5.6)                                        | 18.1 (6.0)                                            | 0.344   |
| SCL-90 Sensitivity score (points)       | 25.2 (7.5)                                        | 26.5 (8.5)                                            | 0.535   |
| SCL-90 Hostility score (points)         | 7.5 (2.0)                                         | 7.8 (2.4)                                             | 0.949   |
| SCL-90 Insomnia score (points)          | 6.5 (3.3)                                         | 6.6 (2.8)                                             | 0.806   |
| SCL-90 Psychoneuroticism score (points) | 142.4 (38.7)                                      | 150.9 (43.5)                                          | 0.229   |

Data shown as mean (SD) or as n (%). Abbreviations: 6MWT. 6-min walk distance; BDI Beck Depression Inventory; COPM. Canadian Occupational Performance Measure; HADS. Hospital Anxiety and Depression Scale; SCL-90 Symptom Checklist 90; SGRQ-C. COPD-specific version of the St. George respiratory questionnaire.

**Table S6. Clinical characteristics in COPD patients with and without impairments in cognitive flexibility**

|                                         | Patients with impairments in cognitive flexibility (n=51) | Patients without impairments in cognitive flexibility (n=132) | P-value |
|-----------------------------------------|-----------------------------------------------------------|---------------------------------------------------------------|---------|
| <b>FUNCTIONAL STATUS</b>                |                                                           |                                                               |         |
| <b>Functional exercise capacity</b>     |                                                           |                                                               |         |
| 6MWT (meters)                           | 434.0 (107.9)                                             | 431.2 (113.7)                                                 | 0.881   |
| 6MWT (% predicted)                      | 68.1 (15.1)                                               | 68.3 (17.2)                                                   | 0.916   |
| <b>Daily activities</b>                 |                                                           |                                                               |         |
| COPM mobility domain, n (%)             | 0.8 (0.4)                                                 | 0.8 (0.4)                                                     | 0.989   |
| Performance score (points)              | 3.8 (1.8)                                                 | 3.8 (1.5)                                                     | 0.949   |
| Satisfaction score (points)             | 2.9 (1.9)                                                 | 2.8 (1.7)                                                     | 0.937   |
| COPM productivity domain, n (%)         | 0.6 (0.5)                                                 | 0.6 (0.5)                                                     | 0.893   |
| Performance score (points)              | 4.0 (1.5)                                                 | 3.9 (1.6)                                                     | 0.750   |
| Satisfaction score (points)             | 3.6 (1.7)                                                 | 3.1 (1.9)                                                     | 0.240   |
| COPM leisure domain, n (%)              | 0.5 (0.5)                                                 | 0.5 (0.5)                                                     | 0.294   |
| Performance score (points)              | 3.3 (1.5)                                                 | 3.5 (1.6)                                                     | 0.611   |
| Satisfaction score (points)             | 2.8 (1.5)                                                 | 2.9 (1.7)                                                     | 0.942   |
| COPM self-care domain, n (%)            | 0.5 (0.5)                                                 | 0.5 (0.5)                                                     | 0.565   |
| Performance score (points)              | 4.6 (1.3)                                                 | 4.0 (1.7)                                                     | 0.109   |
| Satisfaction score (points)             | 3.8 (1.7)                                                 | 2.8 (1.8)                                                     | 0.022   |
| <b>DISEASE-SPECIFIC HEALTH STATUS</b>   |                                                           |                                                               |         |
| CAT score (points)                      | 22.5 (6.2)                                                | 21.8 (6.6)                                                    | 0.544   |
| SGRQ-C symptom score (points)           | 58.8 (18.8)                                               | 62.5 (20.0)                                                   | 0.268   |
| SGRQ-C activity score (points)          | 78.6 (14.0)                                               | 76.5 (14.2)                                                   | 0.31    |
| SGRQ-C impact score (points)            | 49.2 (16.2)                                               | 45.2 (17.0)                                                   | 0.154   |
| SGRQ-C total score (points)             | 59.9 (13.7)                                               | 57.8 (13.9)                                                   | 0.348   |
| <b>PSYCHOLOGICAL WELLBEING</b>          |                                                           |                                                               |         |
| HADS Depression score (points)          | 8.1 (3.7)                                                 | 7.1 (4.1)                                                     | 0.145   |
| HADS Anxiety score (points)             | 8.6 (4.3)                                                 | 7.7 (4.5)                                                     | 0.283   |
| BDI score score (points)                | 17.3 (6.1)                                                | 15.8 (6.2)                                                    | 0.151   |
| SCL-90 Anxiety score (points)           | 10.8 (4.3)                                                | 9.8 (4.2)                                                     | 0.160   |
| SCL-90 Agoraphobia score (points)       | 29.9 (10.8)                                               | 27.2 (10.6)                                                   | 0.133   |
| SCL-90 Depression score (points)        | 25.4 (9.1)                                                | 22.6 (6.8)                                                    | 0.025   |
| SCL-90 Somatization score (points)      | 20.7 (6.6)                                                | 16.9 (5.2)                                                    | <0.001  |
| SCL-90 Insufficiency score (points)     | 28.3 (9.2)                                                | 25.4 (7.7)                                                    | 0.030   |
| SCL-90 Sensitivity score (points)       | 8.2 (2.4)                                                 | 7.5 (2.2)                                                     | 0.098   |
| SCL-90 Hostility score (points)         | 6.8 (3.0)                                                 | 6.5 (2.9)                                                     | 0.424   |
| SCL-90 Insomnia score (points)          | 13.4 (4.3)                                                | 12.3 (4.1)                                                    | 0.098   |
| SCL-90 Psychoneuroticism score (points) | 160.6 (44.1)                                              | 143.9 (40.8)                                                  | 0.016   |

Data shown as mean (SD) or as n (%). Abbreviations: 6MWT. 6-min walk distance; BDI Beck Depression Inventory; COPM. Canadian Occupational Performance Measure; HADS. Hospital Anxiety and Depression Scale; SCL-90 Symptom Checklist 90; SGRQ-C. COPD-specific version of the St. George respiratory questionnaire.
